# Supplementary material for: Temperature effects on heavy rainfall modify catchment hydro-morphologicalresponse
Source: Copernicus journal article supplement (doi:10.5194/esurf-2019-44), 2019-09-16
Supplement: Supplementary file 1 [file esurf-2019-44-supplement.pdf]

# Temperature effects on heavy rainfall modify catchment hydro-morphological response

Nadav Peleg<sup>1</sup>, Chris Skinner<sup>2</sup>, Simone Fatichi<sup>1</sup>, Peter Molnar<sup>1</sup>

<sup>1</sup>Institute of Environmental Engineering, ETH Zurich, Zurich, Switzerland

5 <sup>2</sup>Energy and Environment Institute, University of Hull, UK

## Supplementary Material

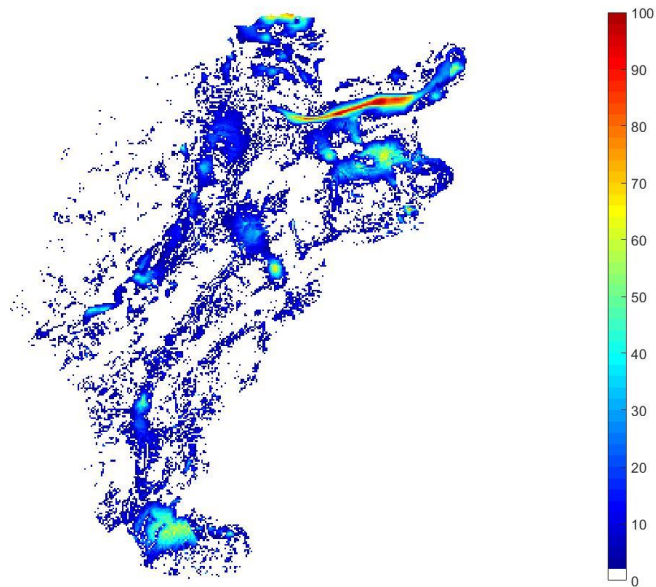

Figure S1. Sediment thickness map of Kleine Emme, units are in meters.

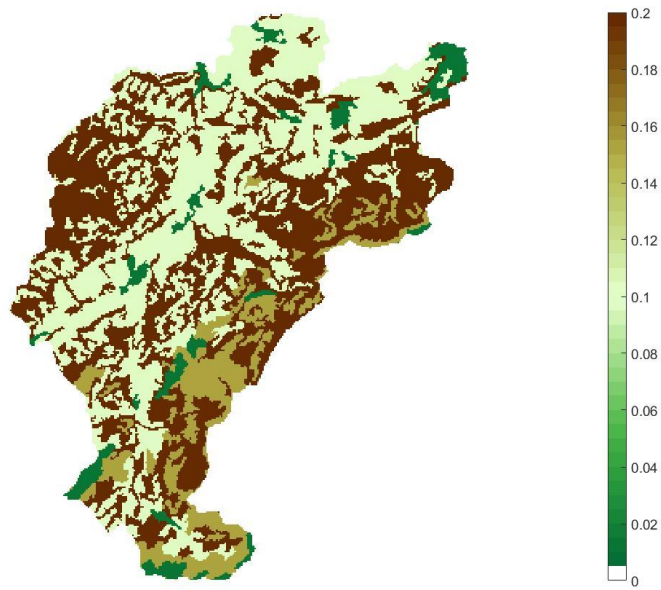

Figure S2. Mannings n values over Kleine Emme.

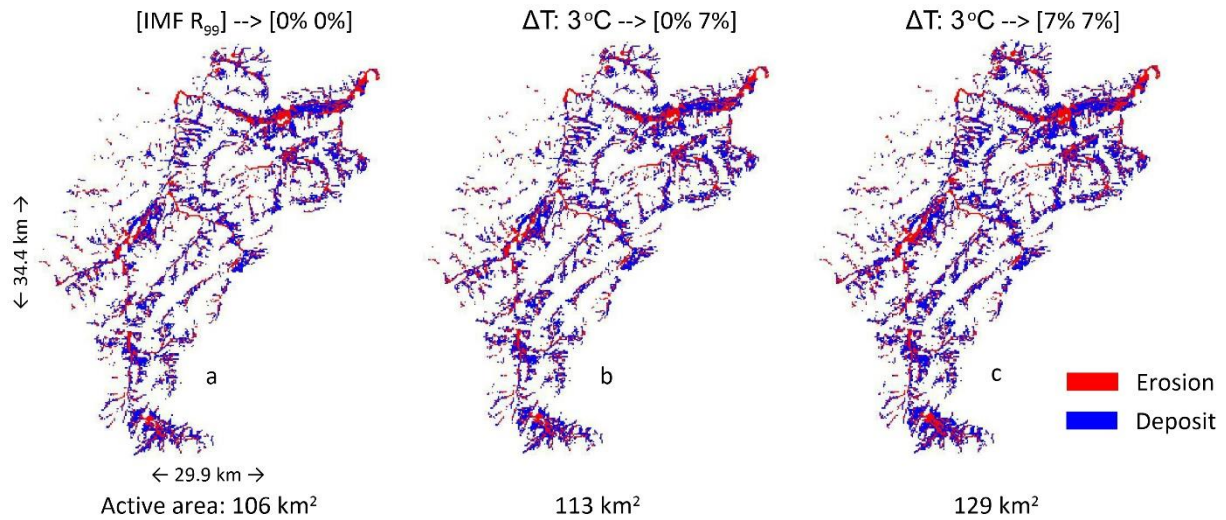

- 5 Figure S3. An example to the changes in the area of erosion (red) and deposition (blue) with storm spatial characteristics. IMF stands for changes in the areal rainfall and  $R_{99}$  for changes in the peak rainfall intensity at the grid-scale.
